# Supplementary material
Source: PubMed Central journal article supplement (PMC3629794)
Supplement: supp_112.201079_jpet_201079_Figure_Legend_Newest.pdf [file supp_112.201079_jpet_201079_Figure_Legend_Newest.pdf]

**A novel non-toxic inhibitor of the activation of NADPH oxidase (NOX2) reduces reactive oxygen species production in mouse lung.** Intae Lee, Chandra Dodia, Shampa Chatterjee, John Zagorski, Clementina Mesaros, Ian A. Blair, Sheldon I. Feinstein, Mahendra Jain, and Aron B. Fisher. The Journal of Pharmacology and Experimental Therapeutics.

## Supplemental Figure legends:

Supplemental Figure 1. Mass spectroscopy of MJ33. A. Chemical structure of MJ33 (1-hexadecyl-3-trifluoroethylglycero-*sn*-2-phosphomethanol) with the mass spectrum and the major fragment indicated (molecular weight; 492,  $MH^+$  493). B. The chemical structure of the internal standard, 17:0-lyso-PC (molecular weight; 510), used for mass spectroscopy.

Supplemental Figure 2. MJ33 does not inhibit ROS production in human pulmonary artery smooth muscle cells (hPASMC). Cells were incubated with liposomes (with or without MJ33) and then labeled with one of the ROS sensitive fluorophores, dehydro dichlorofluoroscein diacetate (DCF) or dihydroethidine (HE). Cells were stimulated with 10  $\mu$ M Ang II and analyzed after 30 min. A. Imaging of cells by fluorescence microscopy. B. The integrated fluorescence for 5-8 individual cells in each field was measured. Data is from n=3 independent experiments. \* $p < 0.001$  as compared to the corresponding basal value.

Supplemental Figure 3. Histological sections of kidneys and livers at 10 days after IV administration of MJ33 (500 nmol in liposomes) or blank liposomes (control). A. Mag x20. scale bars 200  $\mu$ m. B. Mag x63. scale bars 50  $\mu$ m.
