# Supplementary material
Source: PubMed Central journal article supplement (PMC3629794)
Supplement: supp_112.201079_jpet_201079_suppl_fig_1B.pdf [file supp_112.201079_jpet_201079_suppl_fig_1B.pdf]

**A novel non-toxic inhibitor of the activation of NADPH oxidase (NOX2) reduces reactive oxygen species production in mouse lung.**

Intae Lee, Chandra Dodia, Shampa Chatterjee, John Zagorski, Clementina Mesaros, Ian A. Blair, Sheldon I. Feinstein, Mahendra Jain, and Aron B. Fisher. The Journal of Pharmacology and Experimental Therapeutics.

## Supplemental Figure 1.

**B.**

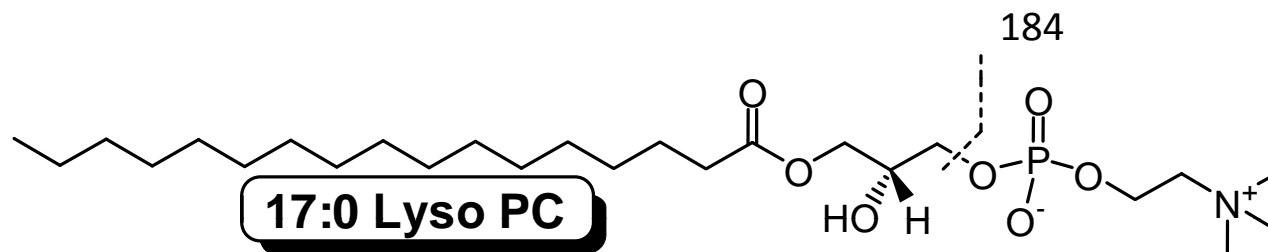

1-heptadecanoyl-2-hydroxy-sn-glycero-3-phosphocholine

Chemical Formula:  $C_{25}H_{52}NO_7P$

Exact Mass: **509.35**

Molecular Weight: 509.66

m/z: 509.35 (100.0%), 510.35 (28.3%), 511.35 (5.1%)
