# Supplementary material
Source: PubMed Central journal article supplement (PMC3629794)

A novel non-toxic inhibitor of the activation of NADPH oxidase (NOX2) reduces reactive oxygen species production in mouse lung. Intae Lee, Chandra Dodia, Shampa Chatterjee, John Zagorski, Clementina Mesaros, Ian A. Blair, Sheldon I. Feinstein, Mahendra Jain, and Aron B. Fisher. The Journal of Pharmacology and Experimental Therapeutics.

### Supplemental Figure 2

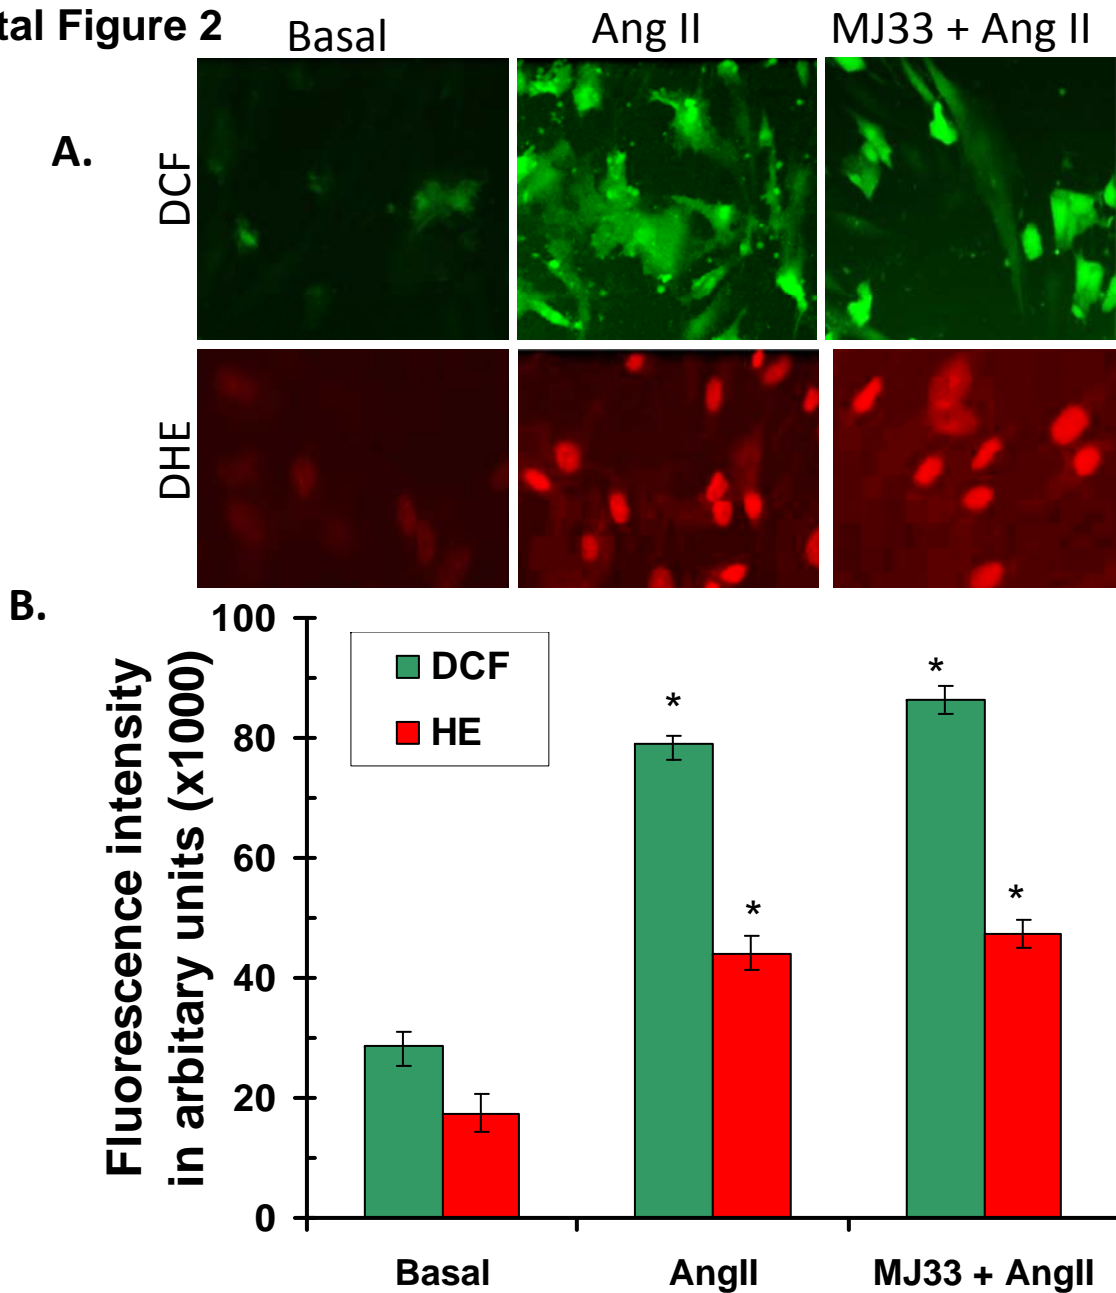

Supplement: supp_112.201079_jpet_201079_suppl_fig_2_revised.pdf [file supp_112.201079_jpet_201079_suppl_fig_2_revised.pdf]
