# Supplementary material
Source: PubMed Central journal article supplement (PMC3629794)

**A novel non-toxic inhibitor of the activation of NADPH oxidase (NOX2) reduces reactive oxygen species production in mouse lung.** Intae Lee, Chandra Dodia, Shampa Chatterjee, John Zagorski, Clementina Mesaros, Ian A. Blair, Sheldon I. Feinstein, Mahendra Jain, and Aron B. Fisher. *The Journal of Pharmacology and Experimental Therapeutics*.

### Supplemental Figure 3

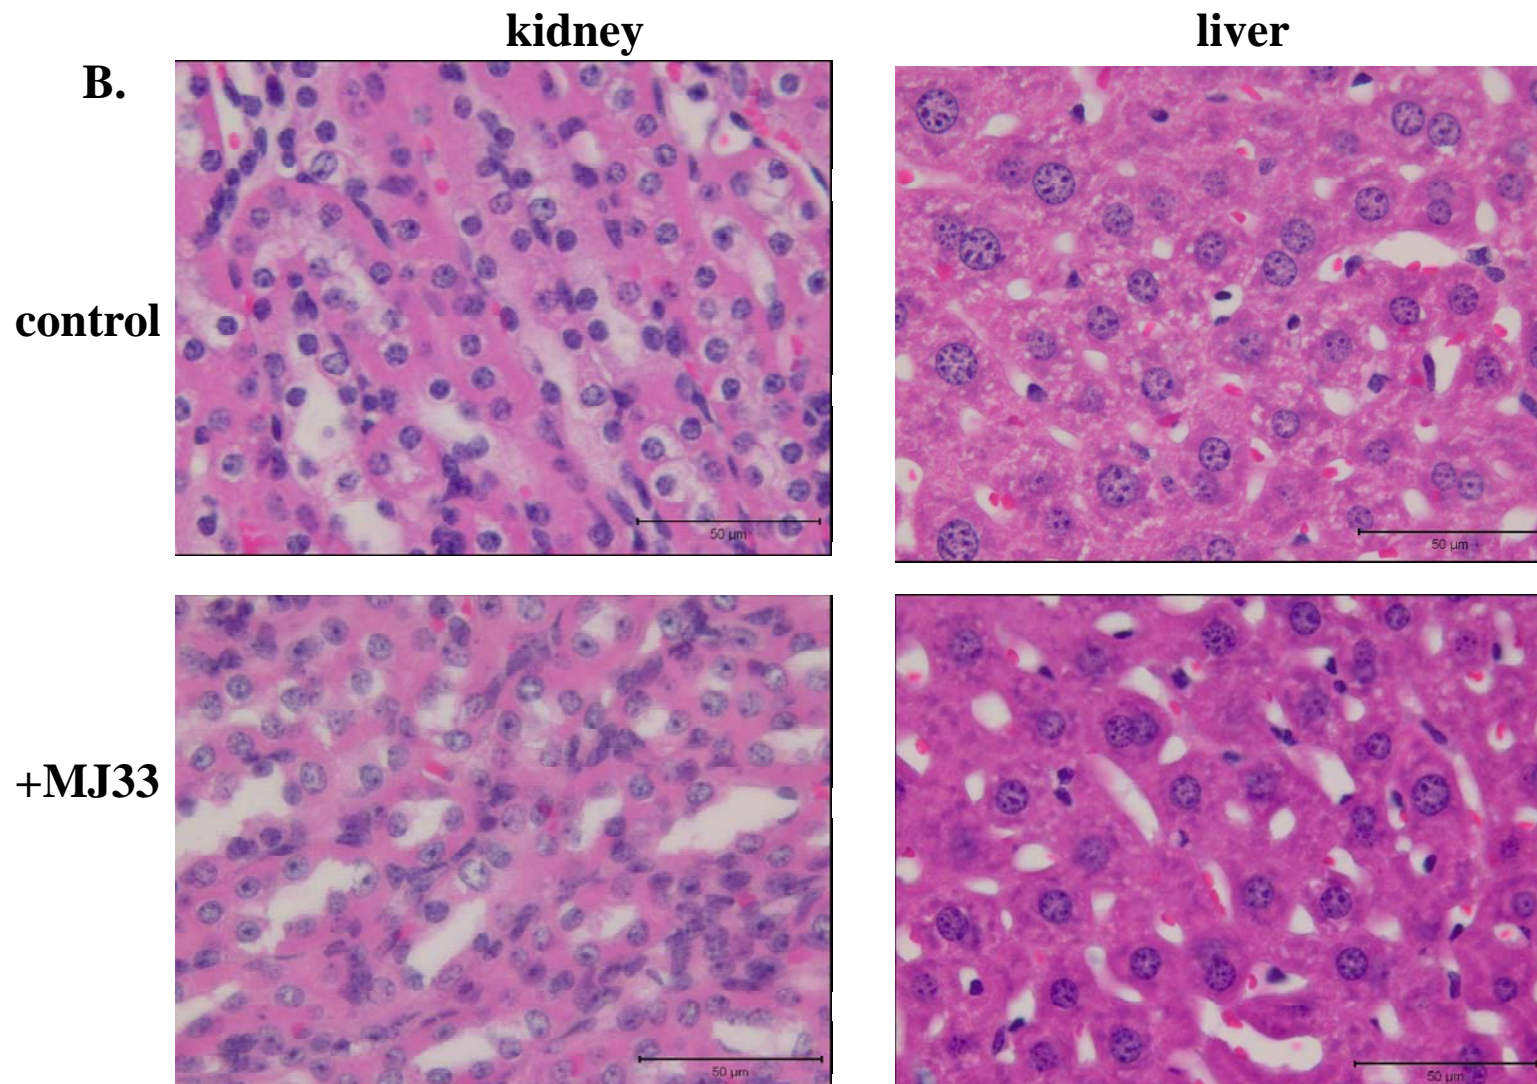

Supplement: supp_112.201079_jpet_201079_suppl_fig_3B.pdf [file supp_112.201079_jpet_201079_suppl_fig_3B.pdf]
